# Supplementary material for: A feasible approach to dispose of soil washing wastes: adsorptive removal of chlorobenzene compounds in aqueous solutions using humic acid modified with monoolein (HA–M)
Source: Royal Society of Chemistry journal article supplement (doi:10.1039/c6ra17949e), 2017-01-01
Supplement: c6ra17949e1.pdf [file c6ra17949e1.pdf]

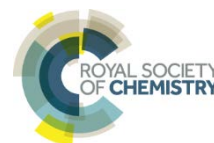

**Electronic Supplementary Information (ESI) for RSC Advances**

**A feasible approach to dispose of soil washing wastes: Adsorptive removal of chlorobenzene compounds in aqueous solutions using humic acid modified with monoolein (HA-M)†**

Yueyue Shen,<sup>a,‡</sup> Shilin Zhao,<sup>ab\*,‡</sup> Yue Li,<sup>a</sup> Qian Liu,<sup>a</sup> Chongdi Ma,<sup>a</sup> Hui Mao,<sup>ab</sup> Yang Liao,<sup>ab\*</sup> and Jun Ma<sup>ab\*</sup>

<sup>a</sup> College of Chemistry and Materials Science, Sichuan Normal University, Chengdu, Sichuan 610068, P.R. China

<sup>b</sup> The Engineering Center for the Development of Farmland Ecosystem Service Function, Sichuan Normal University, Chengdu, Sichuan 610068, P.R. China

Number of pages: 17

Number of figures: 9

Number of tables: 7

\*Corresponding author: Shilin Zhao (S. Zhao), e-mail: [zhaoslin@aliyun.com](mailto:zhaoslin@aliyun.com)

\*Corresponding author: Yang Liao (Y. Liao), e-mail: [liaoyang315\\_sicnu@163.com](mailto:liaoyang315_sicnu@163.com)

\*Corresponding author: Jun Ma (J. Ma), e-mail: [hxxysyzyx@qq.com](mailto:hxxysyzyx@qq.com)

‡ Y. S. ([yshen028@126.com](mailto:yshen028@126.com)) and S. Z. ([zhaoslin@aliyun.com](mailto:zhaoslin@aliyun.com)) contributed equally.

### Figure captions

**Fig. S1.** Chemical structure of monoolein.

**Fig. S2.** Characterization results of the samples. (a) SEM of HA; (b) SEM of HA-M; (c) X-ray diffraction patterns of HA and HA-M; (d) TG of HA-M. (XRD analysis with *Cu K $\alpha$*  radiation, Smart Lab; SEM, FEI-Quanta 250; TG, Heating rate of 10.00 °C/min, Q500, American TQ company, air atmosphere).

**Fig. S3.** The effect of initial pH on the adsorption of HA-M to CBs. (50 mg/L of CBs, 12 h, 25 °C, 0.2 g HA-M)

**Fig. S4.** The pore distribution of HA-M.

**Fig. S5.** Adsorption kinetics of HA-M to CBs; (a) Pseudo-first-order model fitting, (b) Intraparticle diffusion model fitting.

**Fig. S6.** Adsorption isotherm plots for adsorption of CBs onto HA-M, Freundlich model.

**Fig. S7.** The effect of temperature on the adsorptive removal efficiency of HA-M to CBs.

**Fig. S8.** The adsorption conditions of HA-M to OCPs.

**Fig. S9.** Adsorption results of OCPs on HA-M. (a) Pseudo-first-order model fitting, (b) Intraparticle diffusion model fitting, (c) Adsorption efficiency of multi-component OCPs.

### Table captions

**Table S1.** Fitting parameters collected from different models.

**Table S2.** The Langmuir and Freundlich model parameters of the adsorption of CBs on HA-M.

**Table S3.** The adsorption performances of other sorbents to CBs.

**Table S4.** Thermodynamic parameters for the adsorptive removal of CBs on HA-M.

**Table S5.** The effect of coexisting organic matters on the adsorption removal CBs on HA-M.

**Table S6.** Fitting parameters collected from different models of OCPs adsorption removal.

**Table S7.** Physicochemical properties of CBs and OCPs.

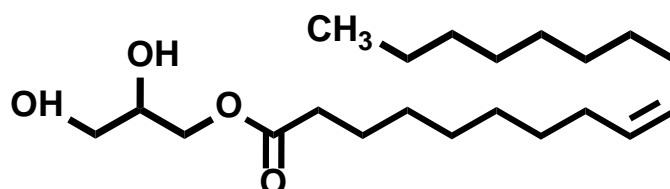

**Fig. S1.** Chemical structure of monoolein.

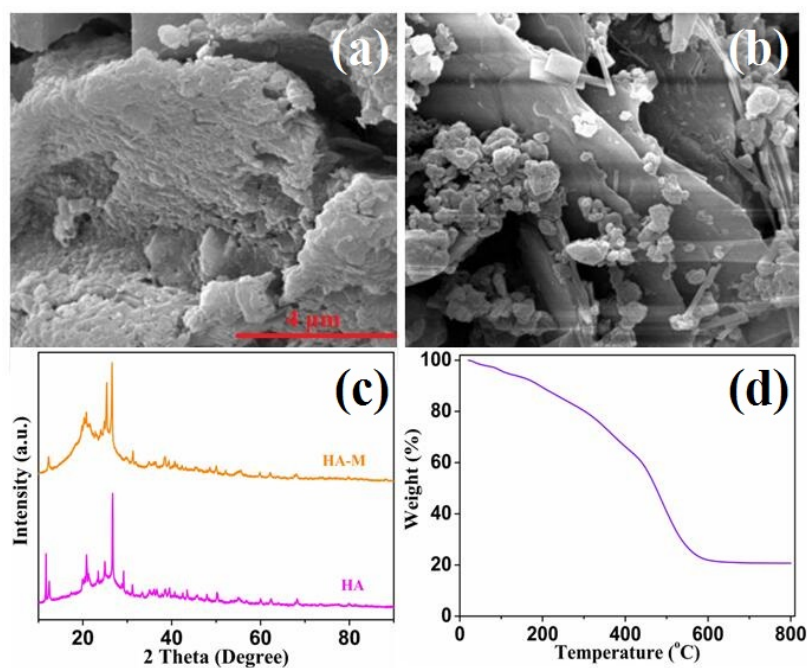

**Fig. S2.** Characterization results of the samples. (a) SEM of HA; (b) SEM of HA-M; (c) X-ray diffraction patterns of HA and HA-M; (d) TG of HA-M. (XRD analysis with *Cu K $\alpha$*  radiation, Smart Lab; SEM, FEI-Quanta 250; TG, Heating rate of 10.00 °C/min, Q500, American TQ company, air atmosphere).

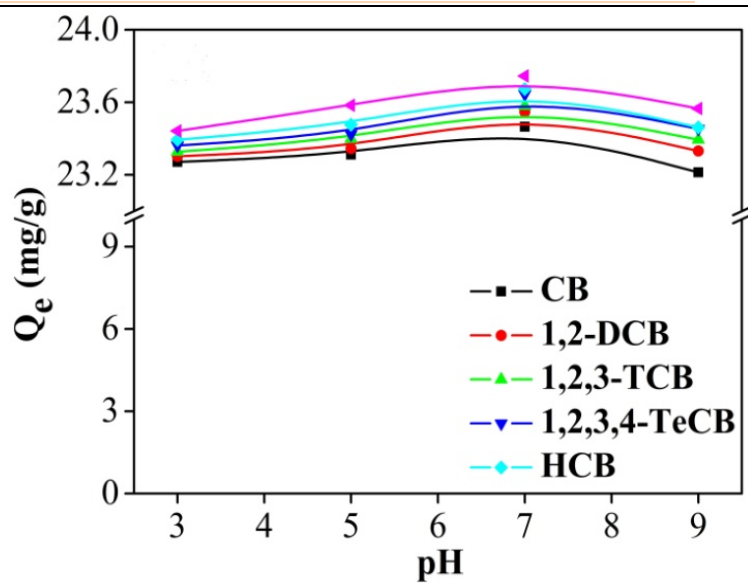

**Fig. S3.** The effect of initial pH on the adsorption of HA-M to CBs.

(50 mg/L of CBs, 12 h, 25 °C, 0.2 g HA-M)

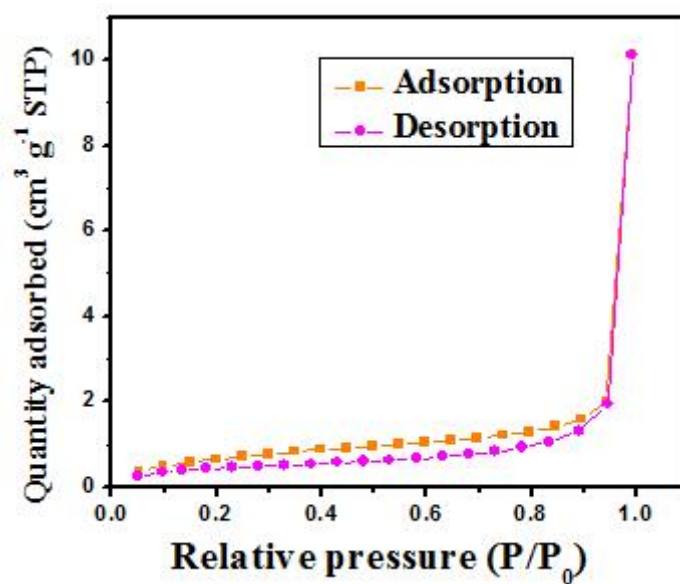

**Fig. S4.** The pore distribution of HA-M.

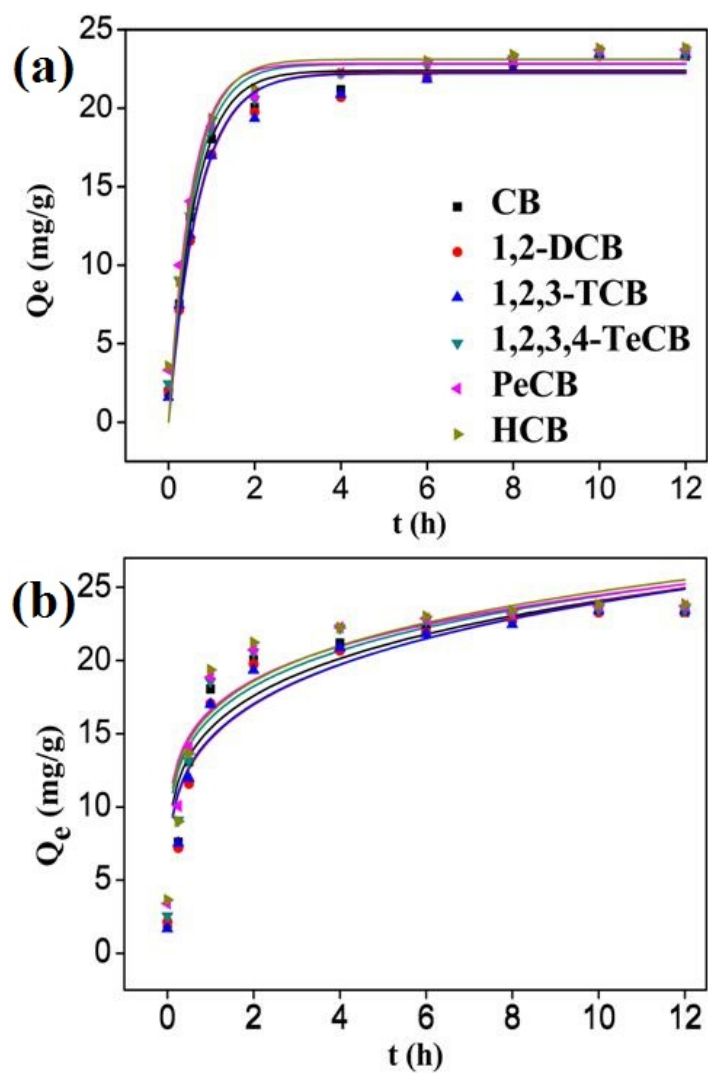

**Fig. S5.** Adsorption kinetics of HA-M to CBs; (a) Pseudo-first-order model fitting, (b) Intraparticle diffusion model fitting.

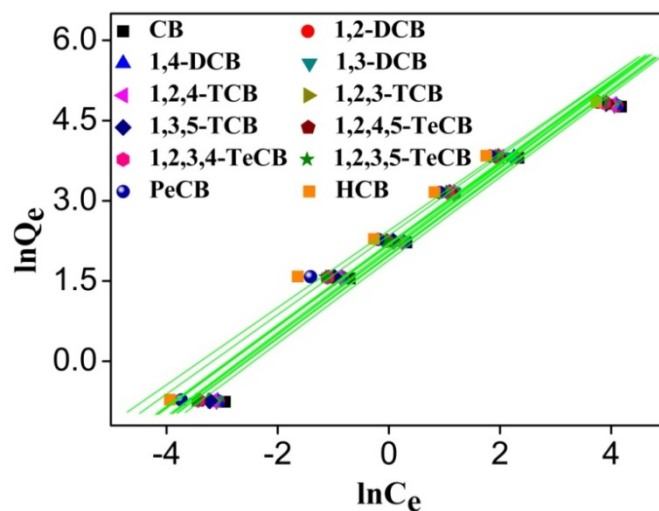

**Fig. S6.** Adsorption isotherm plots for adsorption of CBs onto HA-M, Freundlich model.

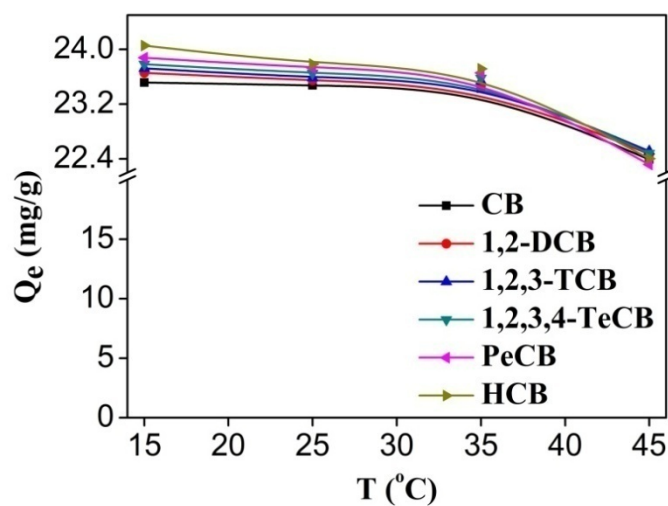

**Fig. S7.** The effect of temperature on the adsorptive removal efficiency of HA-M to CBs.

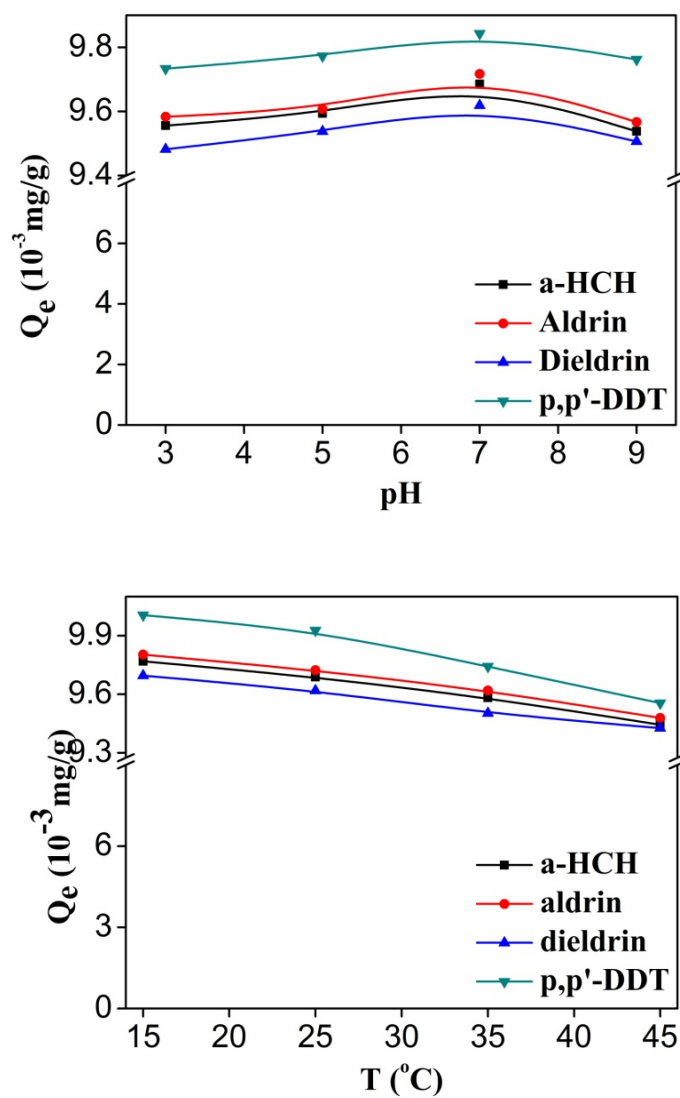

**Fig. S8.** The adsorption conditions of HA-M to OCPs.



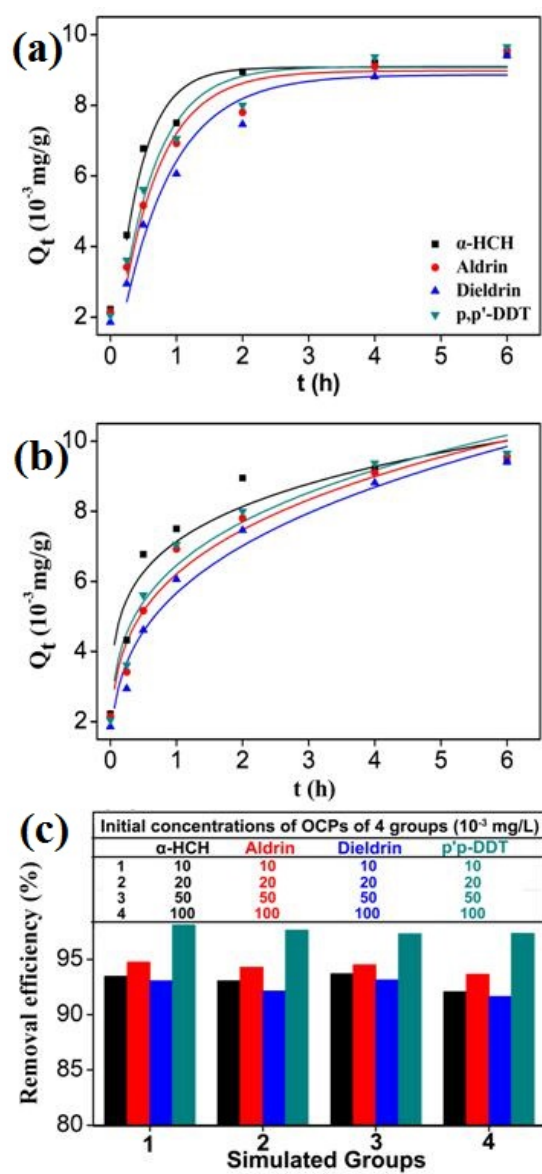

**Fig. S9.** Adsorption results of OCPs on HA-M. (a) Pseudo-first-order model fitting, (b) Intraparticle diffusion model fitting, (c) Adsorption efficiency of multi-component OCPs.

**Table S1.**

Fitting parameters collected from different models.

| Adsorbates   | $Qe^{(exp)}$<br>mg/g | Pseudo-first-order rate model |              |       |       | Pseudo-second-order rate model |              |        |       | Intraparticle diffusion         |       |
|--------------|----------------------|-------------------------------|--------------|-------|-------|--------------------------------|--------------|--------|-------|---------------------------------|-------|
|              |                      | $K_1$                         | $Qe^{(cal)}$ | Error | $R^2$ | $K_2$                          | $Qe^{(cal)}$ | Error  | $R^2$ | $K_3$                           | $R^2$ |
|              |                      | $h^{-1}$                      | mg/g         |       |       | $g/(mg \cdot h)$               | mg/g         |        |       | $g/(mg \cdot g \cdot h^{-0.5})$ |       |
| CB           | 23.427               | 1.645                         | 22.374       | 4.706 | 0.978 | 0.094                          | 24.191       | -3.158 | 0.983 | 15.371                          | 0.829 |
| 1,2-DCB      | 23.582               | 1.428                         | 22.276       | 5.863 | 0.976 | 0.079                          | 24.278       | -2.866 | 0.984 | 14.630                          | 0.858 |
| 1,2,3-TCB    | 23.499               | 1.469                         | 22.194       | 5.879 | 0.976 | 0.083                          | 23.148       | 1.516  | 0.990 | 14.721                          | 0.874 |
| 1,2,3,4-TeCB | 23.571               | 1.745                         | 22.786       | 3.445 | 0.974 | 0.103                          | 24.479       | -3.709 | 0.982 | 16.079                          | 0.835 |
| PeCB         | 23.769               | 1.948                         | 22.826       | 4.131 | 0.954 | 0.118                          | 24.401       | -2.590 | 0.970 | 16.619                          | 0.852 |
| HCB          | 23.882               | 1.813                         | 23.088       | 3.439 | 0.960 | 0.106                          | 24.768       | -3.577 | 0.961 | 16.446                          | 0.808 |

Error =  $[Qe^{(exp)} - Qe^{(cal)}] / Qe^{(cal)} * 100$ ;  $R^2$ , correlation coefficient.

**Table S2.**

The Langmuir and Freundlich model parameters of the adsorption of CBs on HA-M.

| Adsorbates   | Langmuir        |                        |         | Freundlich |         |         |
|--------------|-----------------|------------------------|---------|------------|---------|---------|
|              | $Q_{max}(mg/g)$ | $K_4(L \cdot mg^{-1})$ | $R_1^2$ | $1/n$      | $K_5$   | $R_2^2$ |
| CB           | 235.8491        | 0.0215                 | 0.9798  | 0.5449     | 10.3947 | 0.9747  |
| 1,2-DCB      | 251.8892        | 0.0213                 | 0.9804  | 0.5566     | 10.6031 | 0.9776  |
| 1,4-DCB      | 253.8071        | 0.0213                 | 0.9789  | 0.5586     | 10.6169 | 0.9780  |
| 1,3-DCB      | 265.2512        | 0.0207                 | 0.9742  | 0.5665     | 10.6635 | 0.9795  |
| 1,2,4-TCB    | 271.0027        | 0.0218                 | 0.9655  | 0.5653     | 11.2533 | 0.9757  |
| 1,2,3-TCB    | 277.0083        | 0.0216                 | 0.9607  | 0.5686     | 11.3399 | 0.9771  |
| 1,3,5-TCB    | 280.1120        | 0.0225                 | 0.9615  | 0.5702     | 11.6450 | 0.9788  |
| 1,2,4,5-TeCB | 284.0909        | 0.0226                 | 0.9579  | 0.5699     | 11.8703 | 0.9838  |
| 1,2,3,4-TeCB | 287.3563        | 0.0229                 | 0.9533  | 0.5719     | 12.0313 | 0.9836  |
| 1,2,3,5-TeCB | 290.6977        | 0.0229                 | 0.9512  | 0.5738     | 12.1214 | 0.9837  |
| PeCB         | 301.2048        | 0.0270                 | 0.9509  | 0.5611     | 13.4374 | 0.9842  |
| HCB          | 306.7485        | 0.0287                 | 0.9011  | 0.5788     | 13.7986 | 0.9875  |

**Table S3.**

The adsorption performances of other sorbents to CBs.

| Adsorbates   | Adsorption performance of other sorbents |                            |                  |          |                                        | Ref.      |
|--------------|------------------------------------------|----------------------------|------------------|----------|----------------------------------------|-----------|
|              | Sorbent                                  | Adsorption capacity (mg/g) | Temp. (°C)       | Time (h) | Medium                                 |           |
| HCB          | HA-M                                     | 23.882                     | 25               | 12       | deionized water(methanol as cosolvent) | This work |
| CB           | Marine Sediment                          | < 19                       | 25               | ~6.6     | deionized water                        | 1         |
| 1,2,4-TCB    | Graphene oxide                           | < 3                        | 23 ± 1           | 24       | deionized water                        | 2         |
| 1,2,4,5-TeCB | Carbon Nanotube                          | ~12                        | Room temperature | 3        | deionized water(methanol as cosolvent) | 3         |
| HCB          | Carbonaceous material                    | 0.992                      | 25               | 24       | methanol                               | 4         |

**Table S4.**

Thermodynamic parameters for the adsorptive removal of CBs on HA-M.

| Sorbates     | T (K) | $\Delta G^0$ (KJ/mol) | $\Delta H^0$ (KJ/mol) | $\Delta S^0$ (J/K·mol) | Log $K_d$ |
|--------------|-------|-----------------------|-----------------------|------------------------|-----------|
| CB           | 288   | -2.052                | 62.21                 | 0.675                  | 0.857     |
|              | 298   | -2.122                |                       |                        | 0.856     |
|              | 308   | -2.190                |                       |                        | 0.855     |
|              | 318   | -2.210                |                       |                        | 0.853     |
| 1,2-DCB      | 288   | -2.071                | 61.88                 | 0.653                  | 0.865     |
|              | 298   | -2.138                |                       |                        | 0.863     |
|              | 308   | -2.205                |                       |                        | 0.861     |
| 1,2,3-TCB    | 318   | -2.227                | 62.21                 | 0.675                  | 0.842     |
|              | 288   | -2.126                |                       |                        | 0.888     |
|              | 298   | -2.194                |                       |                        | 0.885     |
|              | 308   | -2.265                |                       |                        | 0.884     |
| 1,2,3,4-TeCB | 318   | -2.287                | 67.21                 | 0.682                  | 0.865     |
|              | 288   | -2.183                |                       |                        | 0.912     |
|              | 298   | -2.253                |                       |                        | 0.909     |
|              | 308   | -2.235                |                       |                        | 0.908     |
| PeCB         | 318   | -2.343                | 80.36                 | 0.706                  | 0.887     |
|              | 288   | -2.349                |                       |                        | 0.981     |
|              | 298   | -2.424                |                       |                        | 0.978     |
| HCB          | 308   | -2.502                | 84.75                 | 0.734                  | 0.977     |
|              | 318   | -2.516                |                       |                        | 0.951     |
|              | 288   | -2.453                |                       |                        | 1.024     |
|              | 298   | -2.526                |                       |                        | 1.019     |
|              | 308   | -2.608                |                       |                        | 1.018     |
|              | 318   | -2.627                |                       |                        | 0.994     |

**Table S5.**

The effect of coexisting organic matters on the adsorption removal CBs on HA-M.

| CBs<br>(Removal efficiency) | Coexisting organic matters              |                    |       |
|-----------------------------|-----------------------------------------|--------------------|-------|
|                             | Benzene                                 | Trichloroethylene  | Blank |
| 1,3,5-TCB (%)               | 95.86 <sup>a</sup> ; 91.00 <sup>b</sup> | 95.63 <sup>a</sup> | 94.29 |

<sup>a</sup> Concentration of coexisting organic matters, 0.5 g/L;  
<sup>b</sup> Concentration of coexisting organic matters, 1.0 g/L;  
 Conditions: Temp., 25 °C; Time, 12 h; 1,3,5-TCB, 10 mg/L.

**Table S6.**

Fitting parameters collected from different models of OCPs adsorption removal.

| Adsorbates | $Qe_{(exp)}$<br>μg/g | Pseudo-first-order rate model |              |       |       | Pseudo-second-order rate model |              |        |       | Intraparticle diffusion         |       |
|------------|----------------------|-------------------------------|--------------|-------|-------|--------------------------------|--------------|--------|-------|---------------------------------|-------|
|            |                      | $K_1$                         | $Qe_{(cal)}$ | Error | $R^2$ | $K_2$                          | $Qe_{(cal)}$ | Error  | $R^2$ | $K_3$                           | $R^2$ |
|            |                      | $h^{-1}$                      | μg/g         |       |       | $g/(μg \cdot h)$               | μg/g         |        |       | $g/(μg \cdot g \cdot h^{-0.5})$ |       |
| α-HCH      | 9.681                | 2.477                         | 9.073        | 6.701 | 0.939 | 0.461                          | 9.831        | -1.526 | 0.999 | 7.130                           | 0.819 |
| Aldrin     | 9.791                | 1.620                         | 8.970        | 9.153 | 0.940 | 0.243                          | 10.12        | -3.270 | 0.999 | 6.200                           | 0.928 |
| Dieldrin   | 9.632                | 1.286                         | 8.858        | 8.738 | 0.944 | 0.202                          | 10.05        | -4.159 | 0.998 | 5.660                           | 0.955 |
| p,p'-DDT   | 9.842                | 1.753                         | 9.094        | 8.225 | 0.929 | 0.283                          | 10.16        | -3.123 | 0.999 | 6.450                           | 0.923 |

Error =  $[Qe_{(exp)} - Qe_{(cal)}] / Qe_{(cal)} \times 100$ ;  $R^2$ , correlation coefficient.

**Table S7.**

Physicochemical properties of CBs and OCPs.

| CBs & OCPs | CAS Registry number | Molar mass ( $\text{g}\cdot\text{mol}^{-1}$ ) | lgKow | Ref. | Molecular structure                                                                   |
|------------|---------------------|-----------------------------------------------|-------|------|---------------------------------------------------------------------------------------|
| CB         | 108-90-7            | 112.56                                        | 2.84  | 5    | 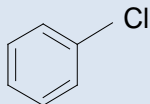   |
| 1,2-DCB    | 95-50-1             | 147.00                                        | 3.38  | 6    |    |
| 1,4-DCB    | 106-46-7            | 147.00                                        | 3.38  | 6    |  |
| 1,3-DCB    | 541-73-1            | 147.00                                        | 3.48  | 6    |  |
| 1,2,4-TCB  | 120-82-1            | 181.45                                        | 3.98  | 6    |  |
| 1,2,3-TCB  | 87-61-6             | 181.45                                        | 4.04  | 6    |  |
| 1,3,5-TCB  | 108-70-3            | 181.45                                        | 4.02  | 6    |  |

|               |          |        |           |   |                                                                                       |
|---------------|----------|--------|-----------|---|---------------------------------------------------------------------------------------|
| 1,2,4,5-TeCB  | 95-94-3  | 215.9  | 4.51      | 6 | 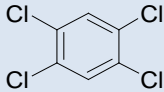   |
| 1,2,3,4-TeCB  | 634-66-2 | 215.9  | 4.55      | 6 |    |
| 1,2,3,5-TeCB  | 634-90-2 | 215.9  | 4.65      | 6 |    |
| PeCB          | 608-93-5 | 250.3  | 5.03      | 6 |    |
| HCB           | 118-74-1 | 284.8  | 5.47      | 6 |  |
| $\alpha$ -HCH | 319-84-6 | 290.83 | 3.80~4.44 | 7 |  |
| Aldrin        | 309-00-2 | 364.9  | 5.31      | 8 |  |
| Dieldrin      | 60-57-1  | 380.91 | 4.30      | 9 |  |

p,p'-DDT

50-29-3

354.48

6.36

10

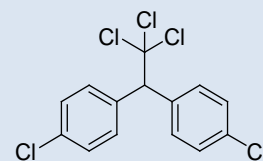

lgKow, the octanol-water partition coefficient.



---

## References of ESI.

- 1 X. K. Zhao, G. P. Yang, P. Wu, et al, *J. colloid interf. Sci.*, 2001, **243**(2): 273-279.
- 2 Z. Pei, L. Li, L. Sun, et al, *Carbon*, 2013, **51**: 156-163.
- 3 L. Ji, F. Liu, Z. Xu, et al, *Environ. Sci. technol.*, 2009, **43**(20): 7870-7876.
- 4 J. Fan, X. Ran, Y. Ren, et al, *Langmuir*, 2016, **32**(39): 9922-9929.
- 5 J. Sangster, J., *J. Phys. Chem. Ref. Data*, 1989, **18**, 1111-1229.
- 6 IUPAC, 1985. *International Union of Pure and Applied Chemistry Solubility Data Series*, **Vol. 20**, Pergamon Press, Oxford.
- 7 D. Mackay, W. Y. Shiu and K. C. Ma, 1997. *Illustrated Handbook of Physical–Chemical Properties and Environmental Fate for Organic Chemicals, Pesticide Chemicals*. Lewis Publishers. Chelsea.
- 8 Y. P. Xu, Z. J. Wang, R. H. Ke and S. U. Khan, *Environ. Sci. Technol.*, 2005, **39**, 1152-1157.
- 9 Y. P. Lu and Z. J. Wang, *Water Res.*, 2003, **37**, 2419-2425.
- 10 S. W. Karickhoff, D. S. Brown and T. A. Scott, *Water Res.*, 1979, **13**, 241-24.
